# Supplementary material for: The Simultaneous Inhibitory Effect of Niclosamide on RANKL-Induced Osteoclast Formation and Osteoblast Differentiation
Source: PubMed Central journal article supplement — Int J Med Sci. 2017 Jul 19;14(9):840–52. doi: 10.7150/ijms.19268 (PMC5562191; doi:10.7150/ijms.19268), 2017-07-19
Supplement: ijmsv14p0840s1.pdf [file ijmsv14p0840s1.pdf]

## Supplementary material

### Quantitative RT-PCR

The primer sequences used were:

MMP9: 5'-CGTCGTGATCCCCACTTACT-3',

5'-AGAGTACTGCTTGCCCAGGA-3';

OC-STAMP: 5'-CAGCCACGGAACACCTCT-3',

5'-GGACAGGCTGGGAGAAGG-3';

c-Fos 5'-GGTGAAGACCGTGTGTCAGGAG-3',

5'-TATTCCGTTCCCTTCGGATT-3';

iTGB3 5'-TCCAGACCCTGGGTACCAAG-3',

5'-GCCAATCCGAAGGTTGCTAG-3';

NFATc1 5'-CGGGAAGAAGATGGTGCTGT-3', 5'-TTGGACGGGGCTGGTTAT-3';

OSCAR: 5'-CCTAGCCTCATACCCCCAG-3',

5'-CAAACCGCCAGGCAGATTG-3';

TRAP 5'-TCCTGGCTCAAAAAGCAGTT-3', 5'-ACATAGCCCACACCGTTCTC-3';

Cathepsin K 5'-CAGCAGAGGTGTGTACTATG-3',

5'-GCGTTGTTCTTACTTCGAGC-3';

RUNX2 5'-GACTGTGGTTACCGTCATGGC-3',

5'-ACTTGGTTTTTCATAACAGCGGA-3' ;

Col-I 5'-ACGTCCTGGTGAAGTTGGTC-3',

5'-CAGGGAAGCCTCTTTCTCCT-3';

ALP 5'-.AGGGCAATGAGGTCACATCC-3', 5'-CACCCGAGTGGTAGTCACAAT-3';

OCN 5'-CAGACAAGTCCCACACAGCA-3',

5'-CTTGGCATCTGTGAGGTCAG-3'.
